# Supplementary material for: Speed and Cumulative Responses According to Body Regions in Patients with Moderate-to-Severe Plaque Psoriasis Treated with Ixekizumab (Interleukin-17A Antagonist) versus Guselkumab (Interleukin-23p19 Inhibitor)
Source: Springer Nature journal article supplement (doi:10.1007/s13555-023-01075-y), 2024-02-01
Supplement: MOESM1 [file 26717886]

**Speed and Cumulative Responses According to Body Regions in Patients with Moderate-to-Severe Plaque Psoriasis Treated with Ixekizumab (Interleukin-17A Antagonist) versus Guselkumab (Interleukin-23p19 Inhibitor)**

Melinda Gooderham,<sup>1,2,3</sup> Ronald Vender,<sup>4,5</sup> Jeffrey Crowley,<sup>6</sup> H. Chih-Ho Hong,<sup>7</sup> Meghan Feely,<sup>8,9</sup>  
Alyssa Garrelts,<sup>8</sup> Kyoungah See,<sup>8</sup> Bruce Konicek,<sup>8</sup> Lawrence Green<sup>10</sup>

<sup>1</sup>Queen's University, Kingston, ON, Canada

<sup>2</sup>Probity Medical Research Inc., Waterloo, ON, Canada

<sup>3</sup>SKiN Centre for Dermatology, Peterborough, ON, Canada

<sup>4</sup>Dermatrials Research Inc., Hamilton, ON, Canada

<sup>5</sup>McMaster University, Hamilton, ON, Canada

<sup>6</sup>Bakersfield Dermatology and Skin Cancer Medical Group, Bakersfield, CA, USA

<sup>7</sup>Department of Dermatology and Skin Science, University of British Columbia, Vancouver, BC, Canada

<sup>8</sup>Eli Lilly and Company, Indianapolis, IN, USA

<sup>9</sup>Mount Sinai, New York, NY, USA

<sup>10</sup>George Washington University School of Medicine, Washington DC, USA

**Corresponding Author**

Melinda Gooderham

E-mail: [mjgooderham@gmail.com](mailto:mjgooderham@gmail.com)

SKiN Centre for Dermatology, Peterborough, ON, Canada

## SUPPLEMENTARY MATERIAL

**Table S1.** List of local investigator sites where ethics review boards approved the IXORA-R study.

| Site Name                            | Site Address                                            | Site City/Town | Site Country  | Site Reference Number | Primary Investigator Name |
|--------------------------------------|---------------------------------------------------------|----------------|---------------|-----------------------|---------------------------|
| Froedtert Memorial Lutheran Hospital | Institutional Review Board<br>8701 Watertown Plank Road | Milwaukee      | United States | 217                   | Kenneth Gordon            |
| Advarra Inc.                         | 6940 Columbia Gateway Drive<br>IRB Suite 110            | Columbia       | United States | 216                   | Scott Guenther            |
| Henry Ford Health System             | 1 Ford Place, 2F                                        | Detroit        | United States | 215                   | Linda Stein-Gold          |
| Advarra Inc.                         | 6940 Columbia Gateway Drive<br>IRB Suite 110            | Columbia       | United States | 214                   | David Fivenson            |
| Advarra Inc.                         | 6940 Columbia Gateway Drive<br>Suite 110                | Columbia       | United States | 191                   | Dana Shipp                |
| Advarra Inc.                         | 6940 Columbia Gateway Drive<br>Suite 110                | Columbia       | United States | 190                   | Samuel Sanchez-Rivera     |
| Advarra Inc.                         | 6940 Columbia Gateway Drive<br>Suite 110                | Columbia       | United States | 189                   | Neil Sadick               |
| Advarra Inc.                         | 6940 Columbia Gateway Drive<br>IRB Suite 110            | Columbia       | United States | 212                   | Gary McCracken            |
| Advarra Inc.                         | 6940 Columbia Gateway Drive<br>IRB Suite 110            | Columbia       | United States | 208                   | Meghan Landis             |
| Advarra Inc.                         | 6940 Columbia Gateway Drive<br>IRB Suite 110            | Columbia       | United States | 203                   | Christine Feser           |
| Advarra Inc.                         | 6940 Columbia Gateway Drive<br>IRB Suite 110            | Columbia       | United States | 202                   | Vassilios Dimitropoulos   |
| Advarra Inc.                         | 6940 Columbia Gateway Drive<br>IRB Suite 110            | Columbia       | United States | 200                   | Lawrence Cheung           |

|              |                                              |          |               |     |                    |
|--------------|----------------------------------------------|----------|---------------|-----|--------------------|
| Advarra Inc. | 6940 Columbia Gateway Drive<br>IRB Suite 110 | Columbia | United States | 213 | Mark McCune        |
| Advarra Inc. | 6940 Columbia Gateway Drive<br>IRB Suite 110 | Columbia | United States | 210 | Craig Leonardi     |
| Advarra Inc. | 6940 Columbia Gateway Drive<br>IRB Suite 110 | Columbia | United States | 209 | PATRICIA LEE       |
| Advarra Inc. | 6940 Columbia Gateway Drive<br>IRB Suite 110 | Columbia | United States | 207 | Charles Hudson     |
| Advarra Inc. | 6940 Columbia Gateway Drive<br>IRB Suite 110 | Columbia | United States | 206 | James Herrmann     |
| Advarra Inc. | 6940 Columbia Gateway Drive<br>IRB Suite 110 | Columbia | United States | 205 | Holly Hake Harris  |
| Advarra Inc. | 6940 Columbia Gateway Drive<br>IRB Suite 110 | Columbia | United States | 204 | Scott Fretzin      |
| Advarra Inc. | 6940 Columbia Gateway Drive<br>IRB Suite 110 | Columbia | United States | 201 | James Coggi        |
| Advarra Inc. | 6940 Columbia Gateway Drive<br>IRB Suite 110 | Columbia | United States | 199 | Jerry Bagel        |
| Advarra Inc. | 6940 Columbia Gateway Drive<br>IRB Suite 110 | Columbia | United States | 198 | William Abramovits |
| Advarra Inc. | 6940 Columbia Gateway Drive<br>IRB Suite 110 | Columbia | United States | 197 | Douglas Young      |
| Advarra Inc. | 6940 Columbia Gateway Drive<br>IRB Suite 110 | Columbia | United States | 195 | Jeffrey Weinberg   |
| Advarra Inc. | 6940 Columbia Gateway Drive<br>IRB Suite 110 | Columbia | United States | 187 | Wendy McFalda      |
| Advarra Inc. | 6940 Columbia Gateway Drive<br>IRB Suite 110 | Columbia | United States | 184 | Shahram Jacobs     |
| Advarra Inc. | 6940 Columbia Gateway Drive<br>IRB Suite 110 | Columbia | United States | 183 | Lydie Hazan        |

|              |                                              |          |               |     |                  |
|--------------|----------------------------------------------|----------|---------------|-----|------------------|
| Advarra Inc. | 6940 Columbia Gateway Drive<br>IRB Suite 110 | Columbia | United States | 181 | Loyd Godwin      |
| Advarra Inc. | 6940 Columbia Gateway Drive<br>IRB Suite 110 | Columbia | United States | 179 | Rion Forconi     |
| Advarra Inc. | 6940 Columbia Gateway Drive<br>IRB Suite 110 | Columbia | United States | 176 | Steven Davis     |
| Advarra Inc. | 6940 Columbia Gateway Drive<br>Suite 110     | Columbia | United States | 172 | Constance Brown  |
| Advarra Inc. | 6940 Columbia Gateway Drive<br>Suite 110     | Columbia | United States | 171 | Brent Boyce      |
| Advarra Inc. | 6940 Columbia Gateway Drive<br>IRB Suite 110 | Columbia | United States | 165 | Fiona Zwald      |
| Advarra Inc. | 6940 Columbia Gateway Drive<br>IRB Suite 110 | Columbia | United States | 164 | Darren Farnesi   |
| Advarra Inc. | 6940 Columbia Gateway Drive<br>IRB Suite 110 | Columbia | United States | 163 | Anthony Gaspari  |
| Advarra Inc. | 6940 Columbia Gateway Drive<br>IRB Suite 110 | Columbia | United States | 161 | Lawrence Osman   |
| Advarra Inc. | 6940 Columbia Gateway Drive<br>IRB Suite 110 | Columbia | United States | 160 | Abby VanVoorhees |
| Advarra Inc. | 6940 Columbia Gateway Drive<br>IRB Suite 110 | Columbia | United States | 156 | Lani Clark       |
| Advarra Inc. | 6940 Columbia Gateway Drive<br>IRB Suite 110 | Columbia | United States | 155 | Suzanne Bruce    |
| Advarra Inc. | 6940 Columbia Gateway Drive<br>IRB Suite 110 | Columbia | United States | 150 | Patrick McElgunn |
| Advarra Inc. | 6940 Columbia Gateway Drive<br>IRB Suite 110 | Columbia | United States | 145 | Aron Gewirtzman  |
| Advarra Inc. | 6940 Columbia Gateway Drive<br>IRB Suite 110 | Columbia | United States | 138 | Scott Miller     |

|                                       |                                              |                |               |     |                         |
|---------------------------------------|----------------------------------------------|----------------|---------------|-----|-------------------------|
| Advarra Inc.                          | 6940 Columbia Gateway Drive<br>IRB Suite 110 | Columbia       | United States | 132 | Jeffery Suchniak        |
| Advarra Inc.                          | 6940 Columbia Gateway Drive<br>IRB Suite 110 | Columbia       | United States | 120 | Brian Johnson           |
| Advarra Inc.                          | 6940 Columbia Gateway Drive<br>IRB Suite 110 | Columbia       | United States | 118 | Rola Gharib             |
| Advarra Inc.                          | 6940 Columbia Gateway Drive<br>Suite 110     | Columbia       | United States | 196 | Paul Yamauchi           |
| Advarra Inc.                          | 6940 Columbia Gateway Drive<br>Suite 110     | Columbia       | United States | 193 | Oscar Soto-Raices       |
| Advarra Inc.                          | 6940 Columbia Gateway Drive<br>Suite 110     | Columbia       | United States | 192 | Stacy Smith             |
| Advarra Inc.                          | 6940 Columbia Gateway Drive<br>Suite 110     | Columbia       | United States | 188 | AMARILIS PEREZ DE JESUS |
| Advarra Inc.                          | 6940 Columbia Gateway Drive<br>Suite 110     | Columbia       | United States | 186 | Mark Lee                |
| Advarra Inc.                          | 6940 Columbia Gateway Drive<br>Suite 110     | Columbia       | United States | 185 | Peter Jenkin            |
| Advarra Inc.                          | 6940 Columbia Gateway Drive<br>Suite 110     | Columbia       | United States | 182 | Jose Gonzalez-Chavez    |
| Advarra Inc.                          | 6940 Columbia Gateway Drive<br>IRB Suite 110 | Columbia       | United States | 180 | Ellen Frankel           |
| Advarra Inc.                          | 6940 Columbia Gateway Drive<br>IRB Suite 110 | Columbia       | United States | 178 | Zoe Diana Draelos       |
| Advarra Inc.                          | 6940 Columbia Gateway Drive<br>IRB Suite 110 | Columbia       | United States | 177 | Eneida de la Torre      |
| University of Utah School of Medicine | 75 S 2000 E                                  | Salt Lake City | United States | 174 | Kristina Callis Duffin  |
| Advarra Inc.                          | 6940 Columbia Gateway Drive<br>IRB Suite 110 | Columbia       | United States | 173 | Michael Bukhalo         |

|              |                                              |          |               |     |                            |
|--------------|----------------------------------------------|----------|---------------|-----|----------------------------|
| Advarra Inc. | 6940 Columbia Gateway Drive<br>IRB Suite 110 | Columbia | United States | 170 | Elizabeth Barranco-Santana |
| Advarra Inc. | 6940 Columbia Gateway Drive<br>IRB Suite 110 | Columbia | United States | 168 | Vandana Madkan             |
| Advarra Inc. | 6940 Columbia Gateway Drive<br>IRB Suite 110 | Columbia | United States | 167 | Jeffrey Crowley            |
| Advarra Inc. | 6940 Columbia Gateway Drive<br>IRB Suite 110 | Columbia | United States | 166 | Seth Forman                |
| Advarra Inc. | 6940 Columbia Gateway Drive<br>IRB Suite 110 | Columbia | United States | 162 | Artis Truett               |
| Advarra Inc. | 6940 Columbia Gateway Drive<br>IRB Suite 110 | Columbia | United States | 159 | Navid Nami                 |
| Advarra Inc. | 6940 Columbia Gateway Drive<br>IRB Suite 110 | Columbia | United States | 157 | Cindy Owen                 |
| Advarra Inc. | 6940 Columbia Gateway Drive<br>IRB Suite 110 | Columbia | United States | 154 | Vivian Laquer              |
| Advarra Inc. | 6940 Columbia Gateway Drive<br>IRB Suite 110 | Columbia | United States | 153 | Jeffrey Travers            |
| Advarra Inc. | 6940 Columbia Gateway Drive<br>IRB Suite 110 | Columbia | United States | 152 | Scott Gottlieb             |
| Advarra Inc. | 6940 Columbia Gateway Drive<br>IRB Suite 110 | Columbia | United States | 151 | Jennifer Cather            |
| Advarra Inc. | 6940 Columbia Gateway Drive<br>IRB Suite 110 | Columbia | United States | 147 | Paul Wallace               |
| Advarra Inc. | 6940 Columbia Gateway Drive<br>IRB Suite 110 | Columbia | United States | 146 | Craig Teller               |
| Advarra Inc. | 6940 Columbia Gateway Drive<br>IRB Suite 110 | Columbia | United States | 144 | Tiffani Hamilton           |
| Advarra Inc. | 6940 Columbia Gateway Drive<br>IRB Suite 110 | Columbia | United States | 143 | Richard Fried              |

|                                        |                                                      |               |               |     |                  |
|----------------------------------------|------------------------------------------------------|---------------|---------------|-----|------------------|
| Wake Forest University Health Sciences | 1 Medical Center Blvd.<br>Institutional Review Board | Winston-Salem | United States | 142 | Steven Feldman   |
| Advarra Inc.                           | 6940 Columbia Gateway Drive<br>IRB Suite 110         | Columbia      | United States | 141 | James Appel      |
| Advarra Inc.                           | 6940 Columbia Gateway Drive<br>IRB Suite 110         | Columbia      | United States | 139 | Min-Wei Lee      |
| Advarra Inc.                           | 6940 Columbia Gateway Drive<br>IRB Suite 110         | Columbia      | United States | 137 | Kelley Yokum     |
| Advarra Inc.                           | 6940 Columbia Gateway Drive<br>IRB Suite 110         | Columbia      | United States | 136 | Jennifer Soung   |
| Advarra Inc.                           | 6940 Columbia Gateway Drive<br>IRB Suite 110         | Columbia      | United States | 134 | Walter Nahm      |
| Advarra Inc.                           | 6940 Columbia Gateway Drive<br>IRB Suite 110         | Columbia      | United States | 133 | Stephen Miller   |
| Advarra Inc.                           | 6940 Columbia Gateway Drive<br>IRB Suite 110         | Columbia      | United States | 131 | Lawrence Green   |
| Advarra Inc.                           | 6940 Columbia Gateway Drive<br>IRB Suite 110         | Columbia      | United States | 130 | John Scott       |
| Advarra Inc.                           | 6940 Columbia Gateway Drive<br>IRB Suite 110         | Columbia      | United States | 129 | Abel Jarell      |
| Advarra Inc.                           | 6940 Columbia Gateway Drive<br>IRB Suite 110         | Columbia      | United States | 128 | Andrew Blauvelt  |
| Advarra Inc.                           | 6940 Columbia Gateway Drive<br>IRB Suite 110         | Columbia      | United States | 127 | Laura Ferris     |
| Advarra Inc.                           | 6940 Columbia Gateway Drive<br>IRB Suite 110         | Columbia      | United States | 126 | Sadra Jazayeri   |
| Advarra Inc.                           | 6940 Columbia Gateway Drive<br>IRB Suite 110         | Columbia      | United States | 125 | George Schmieder |
| Advarra Inc.                           | 6940 Columbia Gateway Drive<br>IRB Suite 110         | Columbia      | United States | 124 | Kelly Taylor     |

|                                                    |                                              |          |               |     |                   |
|----------------------------------------------------|----------------------------------------------|----------|---------------|-----|-------------------|
| Advarra Inc.                                       | 6940 Columbia Gateway Drive<br>IRB Suite 110 | Columbia | United States | 123 | Ashley Cauthen    |
| Advarra Inc.                                       | 6940 Columbia Gateway Drive<br>IRB Suite 110 | Columbia | United States | 122 | David Pariser     |
| Nova Scotia Health Authority Research Ethics Board | 5790 University Ave                          | Halifax  | Canada        | 300 | Richard Langley   |
| Advarra Inc.                                       | 6940 Columbia Gateway Drive<br>IRB Suite 110 | Columbia | United States | 119 | Cathy Barnes      |
| Advarra Inc.                                       | 372 Hollandview Trail<br>Suite 300           | Aurora   | Canada        | 301 | Ronald Vender     |
| Advarra Inc.                                       | 6940 Columbia Gateway Drive<br>IRB Suite 110 | Columbia | United States | 117 | Rawan Jumean      |
| Advarra Inc.                                       | 372 Hollandview Trail<br>Suite 300           | Aurora   | Canada        | 302 | Catherine Maari   |
| Advarra Inc.                                       | 6940 Columbia Gateway Drive<br>IRB Suite 110 | Columbia | United States | 116 | Jill Waibel       |
| Advarra Inc.                                       | 372 Hollandview Trail<br>Suite 300           | Aurora   | Canada        | 303 | Leslie Rosoph     |
| Advarra Inc.                                       | 6940 Columbia Gateway Drive<br>IRB Suite 110 | Columbia | United States | 115 | Rocco Serrao      |
| Advarra Inc.                                       | 372 Hollandview Trail<br>Suite 300           | Aurora   | Canada        | 304 | Melinda Gooderham |
| Advarra Inc.                                       | 6940 Columbia Gateway Drive<br>IRB Suite 110 | Columbia | United States | 113 | Matthew Zook      |
| Health Research Ethics Board of Alberta - HREBA    | 10104 103 Avenue NW<br>Suite 1500            | Edmonton | Canada        | 305 | Kirk Barber       |
| Advarra Inc.                                       | 6940 Columbia Gateway Drive<br>IRB Suite 110 | Columbia | United States | 112 | Stephen Tyring    |
| Health Research Ethics Board of Alberta - HREBA    | 10104 103 Avenue NW<br>Suite 1500            | Edmonton | Canada        | 306 | Alim Devani       |



|                                                 |                                           |            |               |     |                      |
|-------------------------------------------------|-------------------------------------------|------------|---------------|-----|----------------------|
| Western Institutional Review Board - Connexus   | 1019 39th Avenue SE Suite 120             | Puyallup   | United States | 111 | Jessica Kaffenberger |
| Advarra Inc.                                    | 372 Hollandview Trail Suite 300           | Aurora     | Canada        | 307 | Isabelle Delorme     |
| Advarra Inc.                                    | 6940 Columbia Gateway Drive IRB Suite 110 | Columbia   | United States | 109 | Sandra Johnson       |
| Health Research Ethics Board of Alberta - HREBA | 10104 103 Avenue NW Suite 1500            | Edmonton   | Canada        | 308 | Norman Wasel         |
| Advarra Inc.                                    | 6940 Columbia Gateway Drive IRB Suite 110 | Columbia   | United States | 108 | Bruce Rankin         |
| Advarra Inc.                                    | 372 Hollandview Trail Suite 300           | Aurora     | Canada        | 309 | Lyn Guenther         |
| Advarra Inc.                                    | 6940 Columbia Gateway Drive IRB Suite 110 | Columbia   | United States | 107 | Francisco Kerdel     |
| Advarra Inc.                                    | 372 Hollandview Trail Suite 300           | Aurora     | Canada        | 310 | Aditya Gupta         |
| Advarra Inc.                                    | 6940 Columbia Gateway Drive IRB Suite 110 | Columbia   | United States | 106 | Neil Korman          |
| Health Research Ethics Authority                | 95 Bonaventure Ave Ste 200                | St. John's | Canada        | 311 | Kamal Ohson          |
| Advarra Inc.                                    | 6940 Columbia Gateway Drive IRB Suite 110 | Columbia   | United States | 105 | Todd Schlesinger     |
| Advarra Inc.                                    | 372 Hollandview Trail Suite 300           | Aurora     | Canada        | 312 | Lorne Albrecht       |
| Advarra Inc.                                    | 6940 Columbia Gateway Drive IRB Suite 110 | Columbia   | United States | 104 | James Krell          |
| Advarra Inc.                                    | 372 Hollandview Trail Suite 300           | Aurora     | Canada        | 313 | Chih-ho Hong         |
| Advarra Inc.                                    | 6940 Columbia Gateway Drive IRB Suite 110 | Columbia   | United States | 101 | David Greenstein     |

|                                               |                                           |          |               |     |                         |
|-----------------------------------------------|-------------------------------------------|----------|---------------|-----|-------------------------|
| Advarra Inc.                                  | 372 Hollandview Trail Suite 300           | Aurora   | Canada        | 314 | Jean-Sebastien Gauthier |
| Advarra Inc.                                  | 6940 Columbia Gateway Drive IRB Suite 110 | Columbia | United States | 100 | Angela Moore            |
| Advarra Inc.                                  | 372 Hollandview Trail Suite 300           | Aurora   | Canada        | 315 | Mani Raman              |
| Western Institutional Review Board - Connexus | 1019 39th Avenue SE Suite 120             | Puyallup | United States | 103 | Boni Elewski            |
| Bannatyne Campus Research Ethics Board        | P126-770 Bannatyne Avenue                 | Winnipeg | Canada        | 316 | Marni Wiseman           |
| Advarra Inc.                                  | 6940 Columbia Gateway Drive IRB Suite 110 | Columbia | United States | 110 | Sunil Dhawan            |
| Advarra Inc.                                  | 372 Hollandview Trail Suite 300           | Aurora   | Canada        | 317 | Mark Lomaga             |
| Advarra Inc.                                  | 6940 Columbia Gateway Drive IRB Suite 110 | Columbia | United States | 102 | Matthew Zirwas          |
| Advarra Inc.                                  | 372 Hollandview Trail Suite 300           | Aurora   | Canada        | 318 | Charles Lynde           |
| Advarra Inc.                                  | 6940 Columbia Gateway Drive IRB Suite 110 | Columbia | United States | 114 | David Cohen             |
| Advarra Inc.                                  | 372 Hollandview Trail Suite 300           | Aurora   | Canada        | 319 | Kim Papp                |
